# Supplementary material
Source: Springer Nature journal article supplement (https://www.springermedizin.de/resource/supplementary/12889_2012_4942_MOESM1_ESM.pdf/9493464)
Supplement: MOESM1 [file 9493464]

**STUDY SAMPLE** n=144

33 midwives, 66 child health nurses, 21 dental hygienists/dental nurses, 24 open pre-school teachers

DECLINED PARTICIPATION n=10  
3 midwives, 6 child health nurses,  
1 dental hygienist/dental nurses

**RESPONSE RATE PRE-IMPLEMENTATION 93%** n=134

midwives 91% (n=30), child health nurses 91% (n=60), dental hygienists/dental nurses 95% (n=20), open pre-school teachers 100% (n=24)

LOST TO FOLLOW-UP n=25  
8 midwives, 12 child health nurses, 1  
dental hygienist/dental nurse, 4 open  
pre-school teachers. Of these, 8 declined  
participation **and** 17 had changed  
**employer**, were retired or on sick leave

**RESPONSE RATE POST-IMPLEMENTATION 81%** n=109

midwives 73% (n=22), child health nurses 80% (n=48), dental hygienists/dental nurses 95% (n=19), open pre-school teachers 83% (n=20)
